# Supplementary material for: PbSe hierarchical nanostructures: solvothermal synthesis, growth mechanism and their thermoelectric transportation properties
Source: Royal Society of Chemistry journal article supplement (doi:10.1039/c4ce00714j), 2014-07-04
Supplement: c4ce00714j1.pdf [file c4ce00714j1.pdf]

Supplementary Information

**PbSe hierarchical nanostructures: solvothermal synthesis, growth mechanism and their thermoelectric transportation properties**

Xiaorui Shi, Gang Chen,\* Dahong Chen, Rencheng Jin and Haiming Xu

Department of Chemistry, Harbin Institute of Technology, Harbin, 150001, People's Republic of China.

Email: [gchen@hit.edu.cn](mailto:gchen@hit.edu.cn)

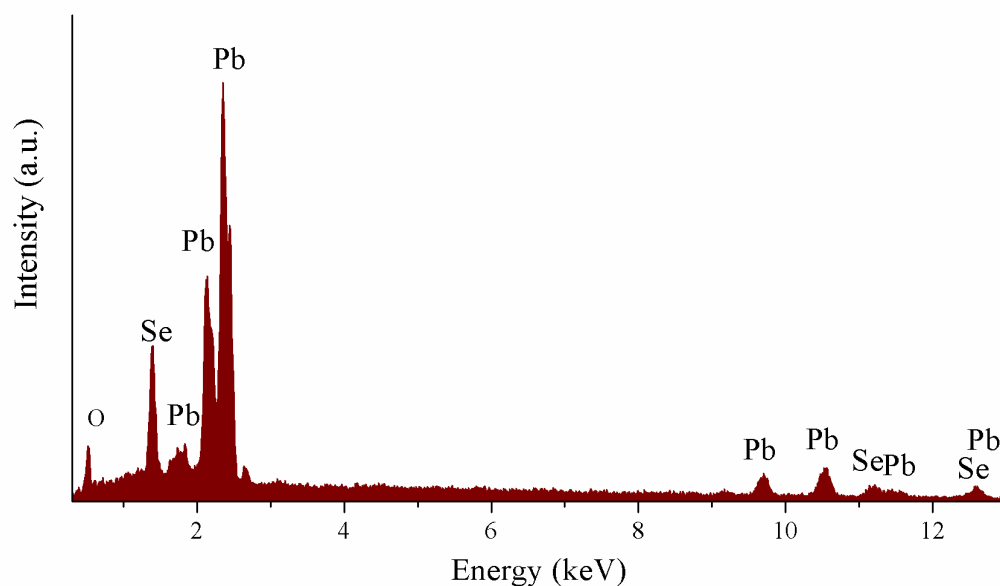

Fig. S1 The corresponding EDS spectrum showing the presence of all the expected elements in the products

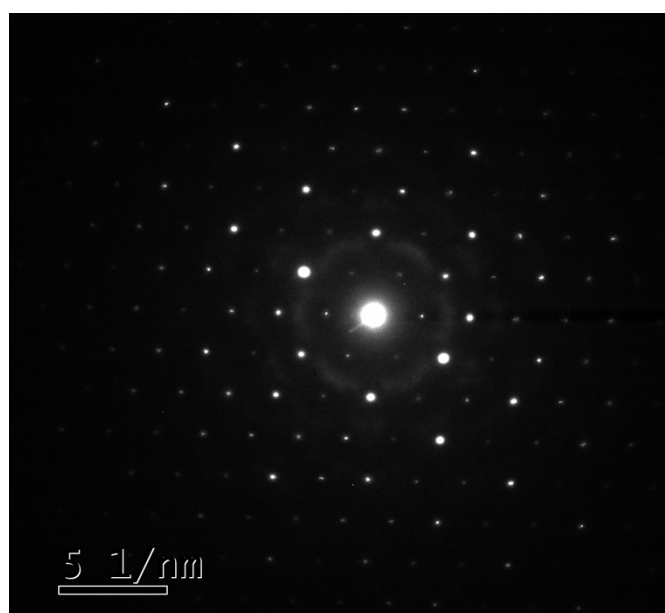

Fig. S2 SAED pattern taken from a single sheet

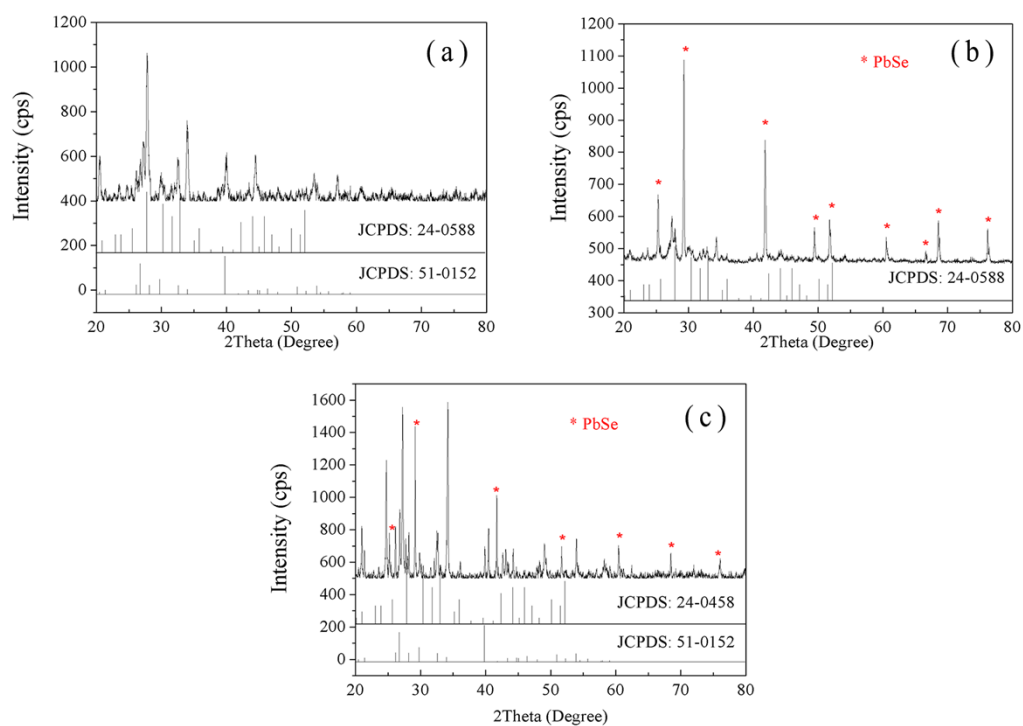

Fig. S3 XRD patterns of the products synthesized at different temperatures for a reaction time of 9 h (a) 160 °C, (b) 180 °C and (c) 200 °C
